# Supplementary material
Source: PubMed Central journal article supplement (PMC2709306)
Supplement: jn.109.109934_1.pdf [file jn.109.109934_1.pdf]

Online Supporting Material  
Supplemental Figure 1

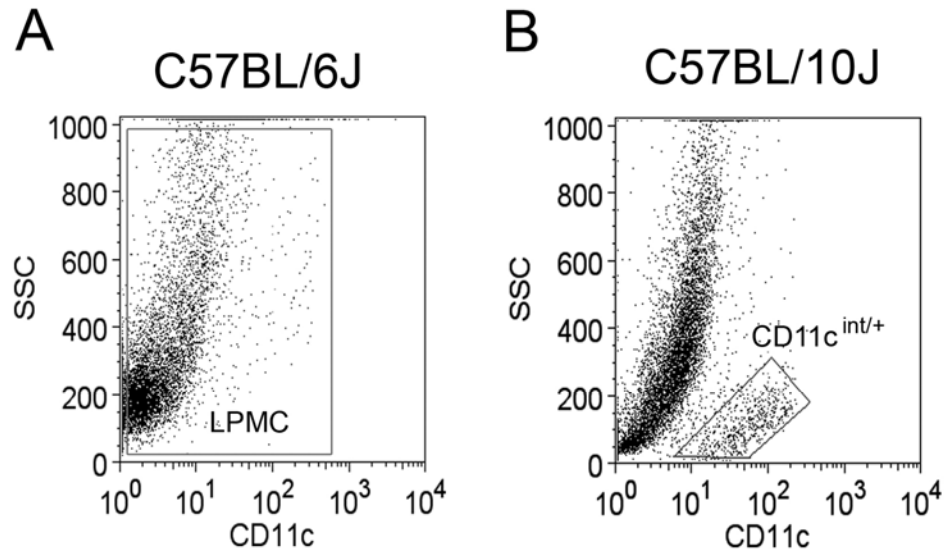

**Identification of CD11c<sup>+</sup> cells in C57BL/6J (A) and C57BL10J (B) mice with flow cytometric analysis.** Each experiment is involved in the pooling tissues from five or six mice.

**Online Supporting Material  
Supplemental Figure 2**

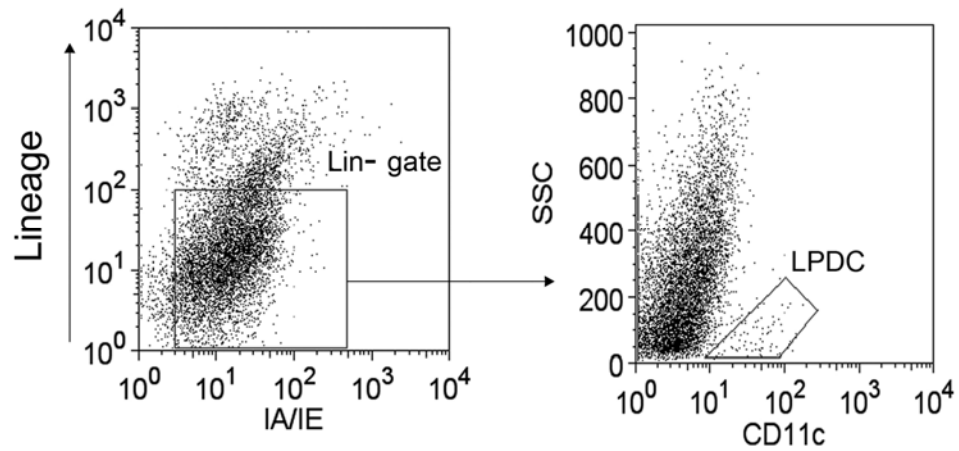

**Identification of intestinal lamina propria dendritic cells in C57BL/10J mice with lineage depletion strategy-based flow cytometric analysis.** Each experiment is involved in the pooling tissues from five or six mice.

**Online Supporting Material  
Supplemental Figure 3**

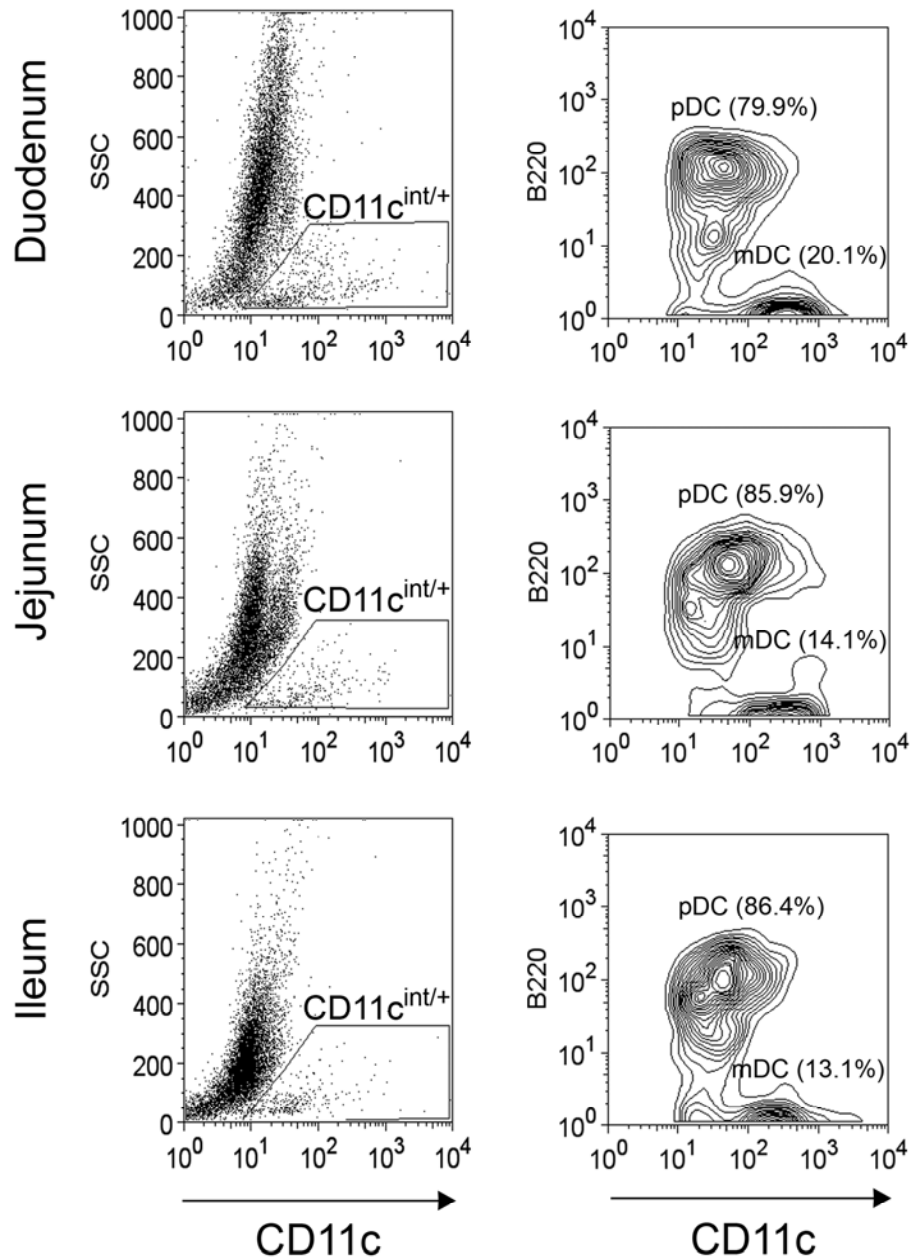

**Characterization of lamina propria DC subsets in duodenum, jejunum and ileum of naïve C57BL/10J mice.** Each experiment is involved in the pooling tissues from five or six mice. Data are representative of three separate experiments.

Online Supporting Material  
Supplemental Figure 4

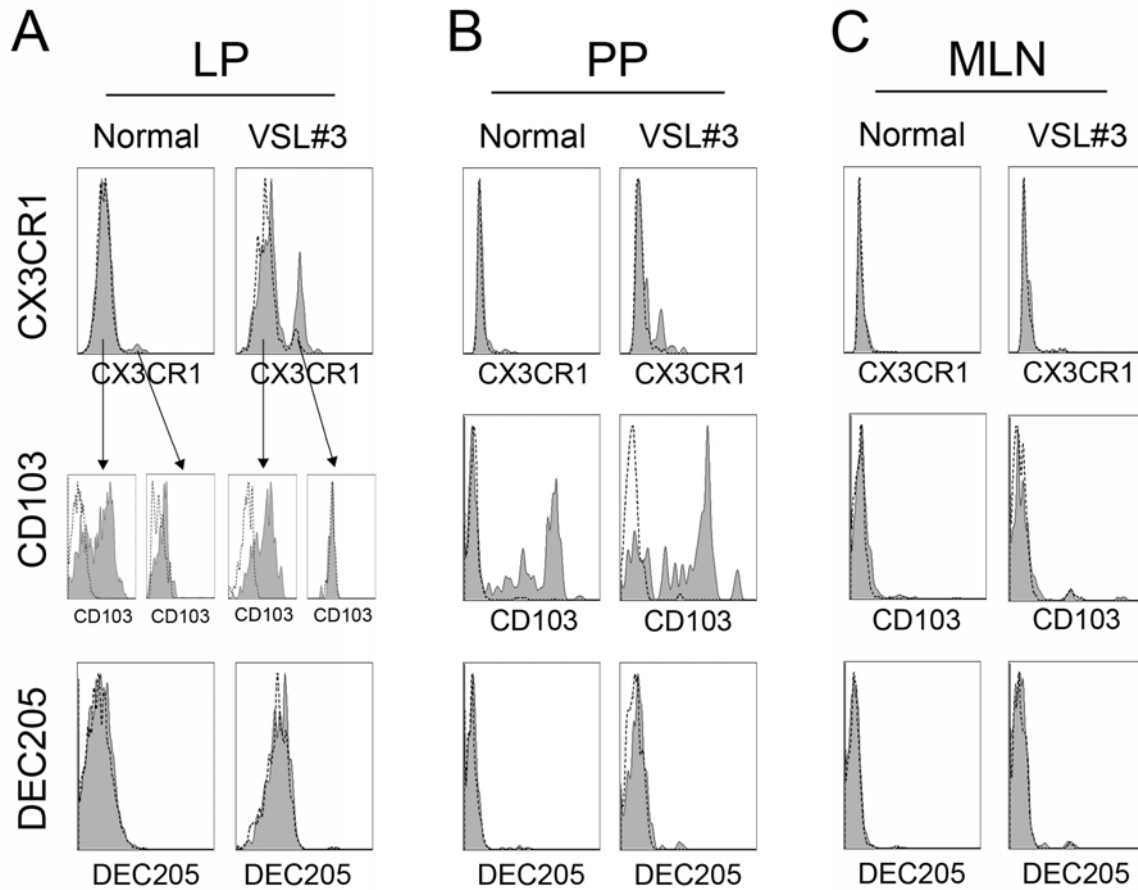

**Flow cytometric analysis of pDC subsets of lamina propria (A), Peyer's patches (B), and mesenteric lymph nodes (C) in C57BL/10J mice fed with VSL#3 or vehicle for 7 days.** Each experiment is involved in the pooling tissues from five or six mice. LP, lamina propria; PP, Peyer's patches; MLN, mesenteric lymph nodes.

**Online Supporting Material  
Supplemental Figure 5**

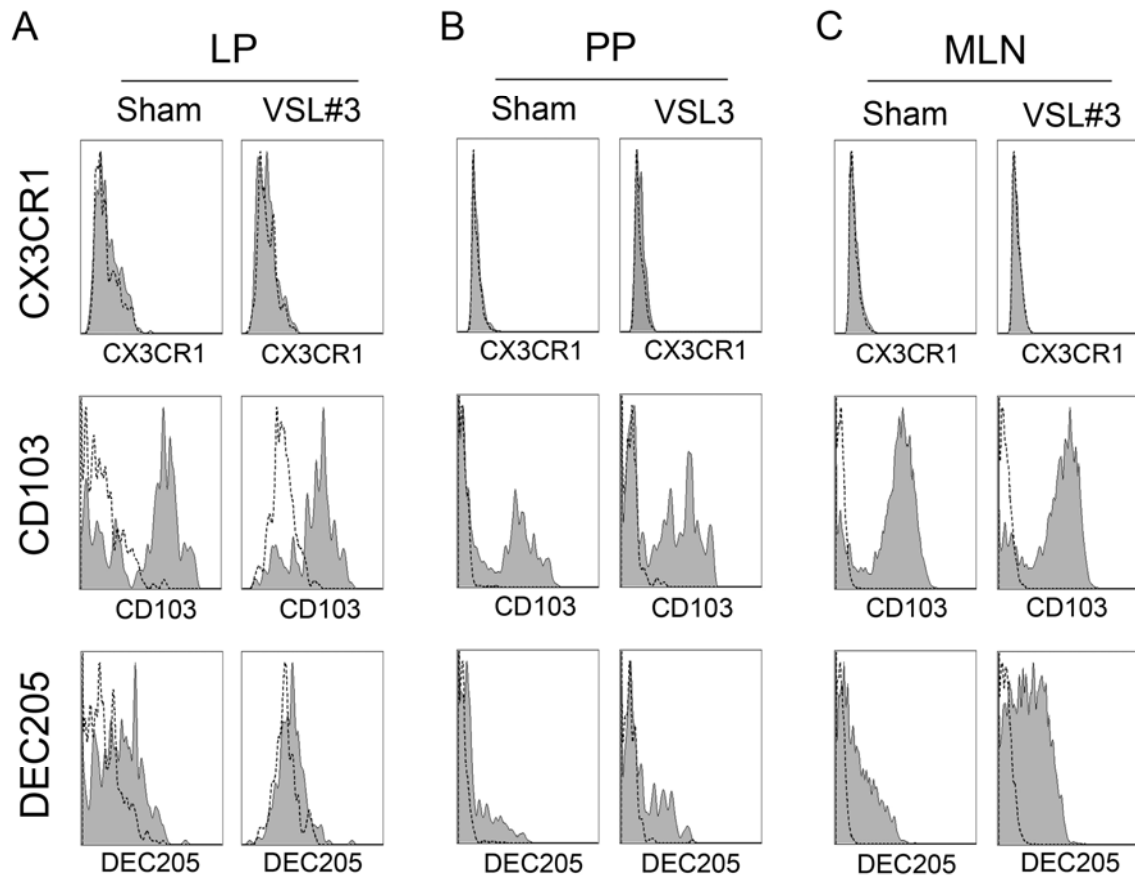

**Flow cytometric analysis of mDC subsets of lamina propria (A), Peyer's patches (B), and mesenteric lymph nodes (C) in C57BL/10J mice fed with VSL#3 or vehicle for 7 days.** Each experiment is involved in the pooling tissues from five or six mice. LP, lamina propria; PP, Peyer's patches; MLN, mesenteric lymph nodes.
